# Supplementary material
Source: PubMed Central journal article supplement (PMC2323257)

**Supplementary Figure S1. Targeting construct for generation of liver-specific deletion of *Hdac3*.** Exon 7 of the *Hdac3* allele was flanked by loxP sites (red triangles) to create a floxed (fl) allele, and crossed to *EIIA-Cre* recombinase expressing mice to generate the *Hdac3* null (-) allele, lacking Exon 7. Wild type (fl/+), heterozygous (fl/-) and floxed (fl/fl) mice were crossbred to *Mx1-Cre* or *Alb-Cre* expressing mice to generate *Hdac3*-null hepatocytes *in vivo*.

**Genotype: *Mx:Hdac3<sup>fl/+</sup>* or *Alb:Hdac3<sup>fl/+</sup>***

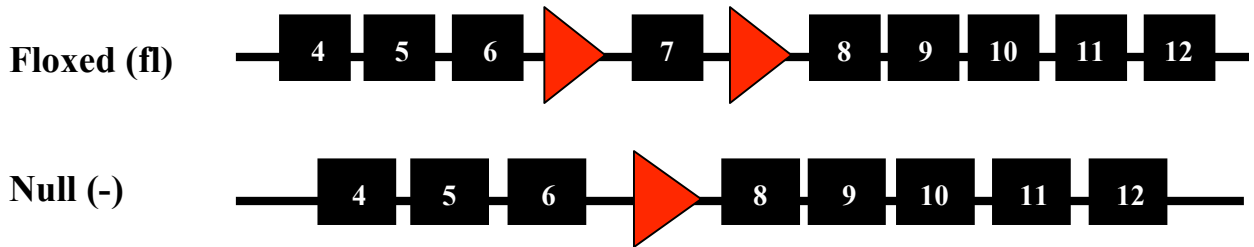

**Genotype: *Mx:Hdac3<sup>fl/-</sup>* or *Alb:Hdac3<sup>fl/-</sup>***

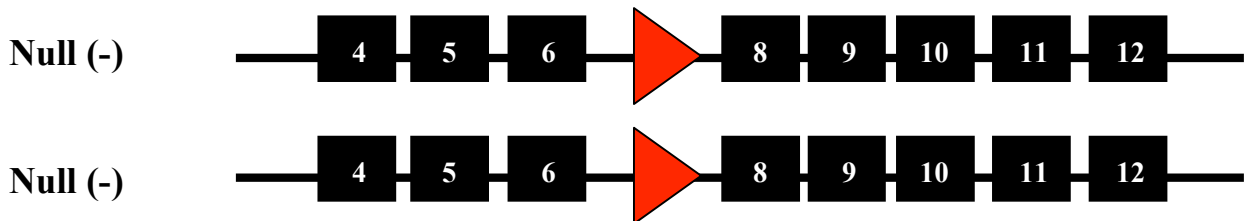

Supplement: emboj200851s1.pdf [file emboj200851s1.pdf]
