# Supplementary material
Source: PubMed Central journal article supplement (PMC2323257)

**Supplementary Figure S2. Analysis of hepatocyte cell proliferation and death in *Alb:Hdac3<sup>fl/-</sup>* mice.** (A) Identification of cycling cells in *Hdac3*-null livers by Ki67 immunohistochemistry. Positive cells are stained brown (10X). (B) Quantification of BrdU incorporation at the indicated time points (P17,  $p = 0.25$ ; P28,  $p = 0.003$ ; P56,  $p = 0.021$ ). Data shown as a % of BrdU positive nuclei per 100 hepatocytes. (C) TUNEL immunohistochemistry was used to detect cells actively undergoing apoptosis in P17 *Alb:Hdac3* livers. The apoptotic cells are stained brown as indicated by the arrows. (D) Serum alanine transaminase (ALT) levels were measured to assess hepatocyte damage at the indicated ages from the serum of *Alb:Hdac3* mice (P17,  $p = 0.0002$ ; P28,  $p = 0.0023$ ; P56,  $p = 0.0001$ ). Statistics were generated using the Student's t-test.

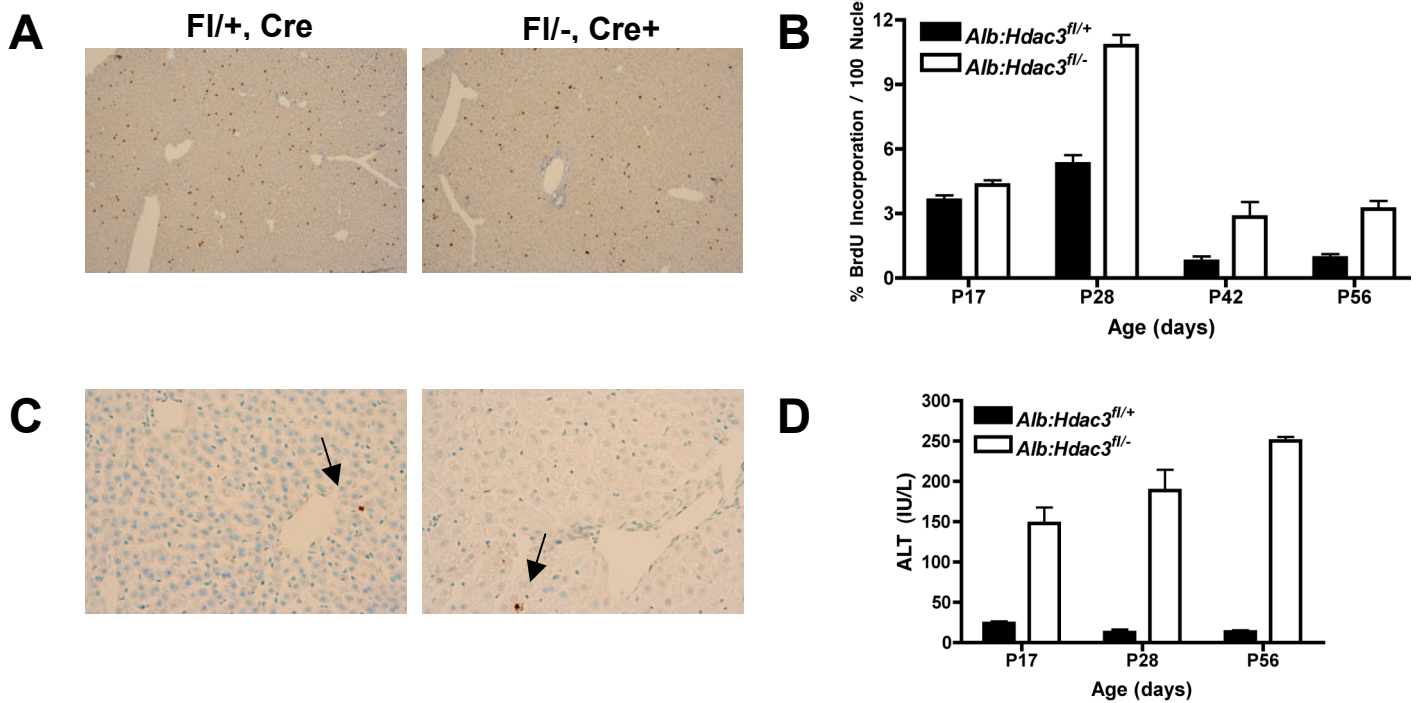

Supplement: emboj200851s2.pdf [file emboj200851s2.pdf]
