# Supplementary material
Source: PubMed Central journal article supplement (PMC2323257)

### Supplementary Figure S3. Ingenuity Pathway Analysis of P17 and P28 microarray data.

(A) Computer-assisted identified transcriptional networks denoting up-regulation of *Pparγ* and genes regulated by *Pparγ* at P17 (top) and P28 (bottom). Red shading correlates with increased gene expression, with darker shading indicating a higher fold change.

#### P17 Network

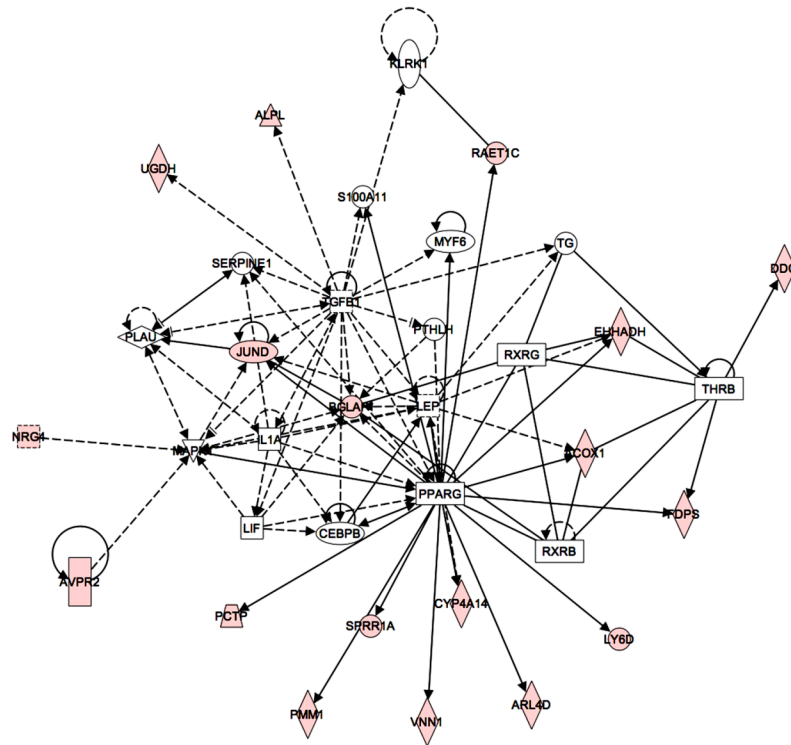

© 2000-2007 Ingenuity Systems, Inc. All rights reserved.

#### P28 Network

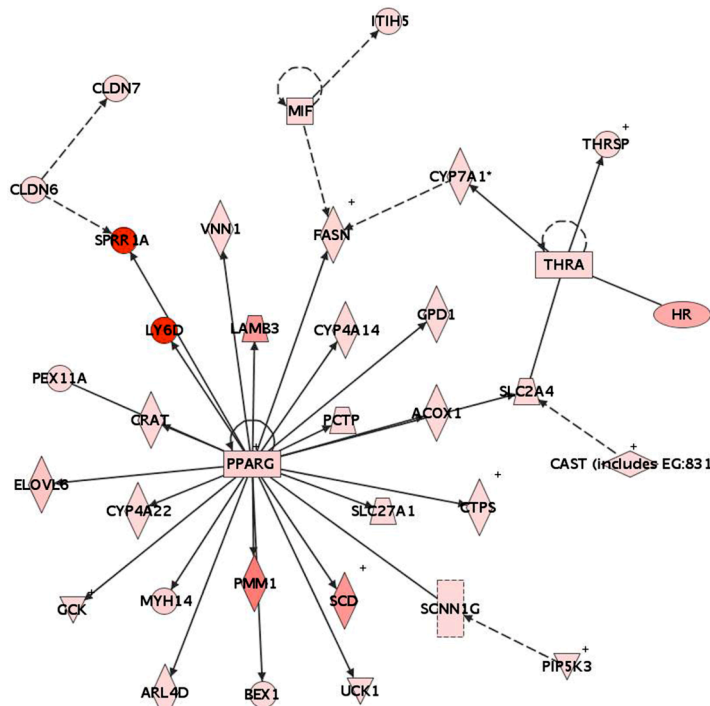

Supplement: emboj200851s3.pdf [file emboj200851s3.pdf]
