# Supplementary material
Source: PubMed Central journal article supplement (PMC2323257)

Supplementary Figure S4. Validation of up-regulated transcripts from P17 microarray analysis by Q-RT-PCR. Each graph represents fold increase from microarray data (in white) and fold increase verified by Q-RT-PCR (in black).

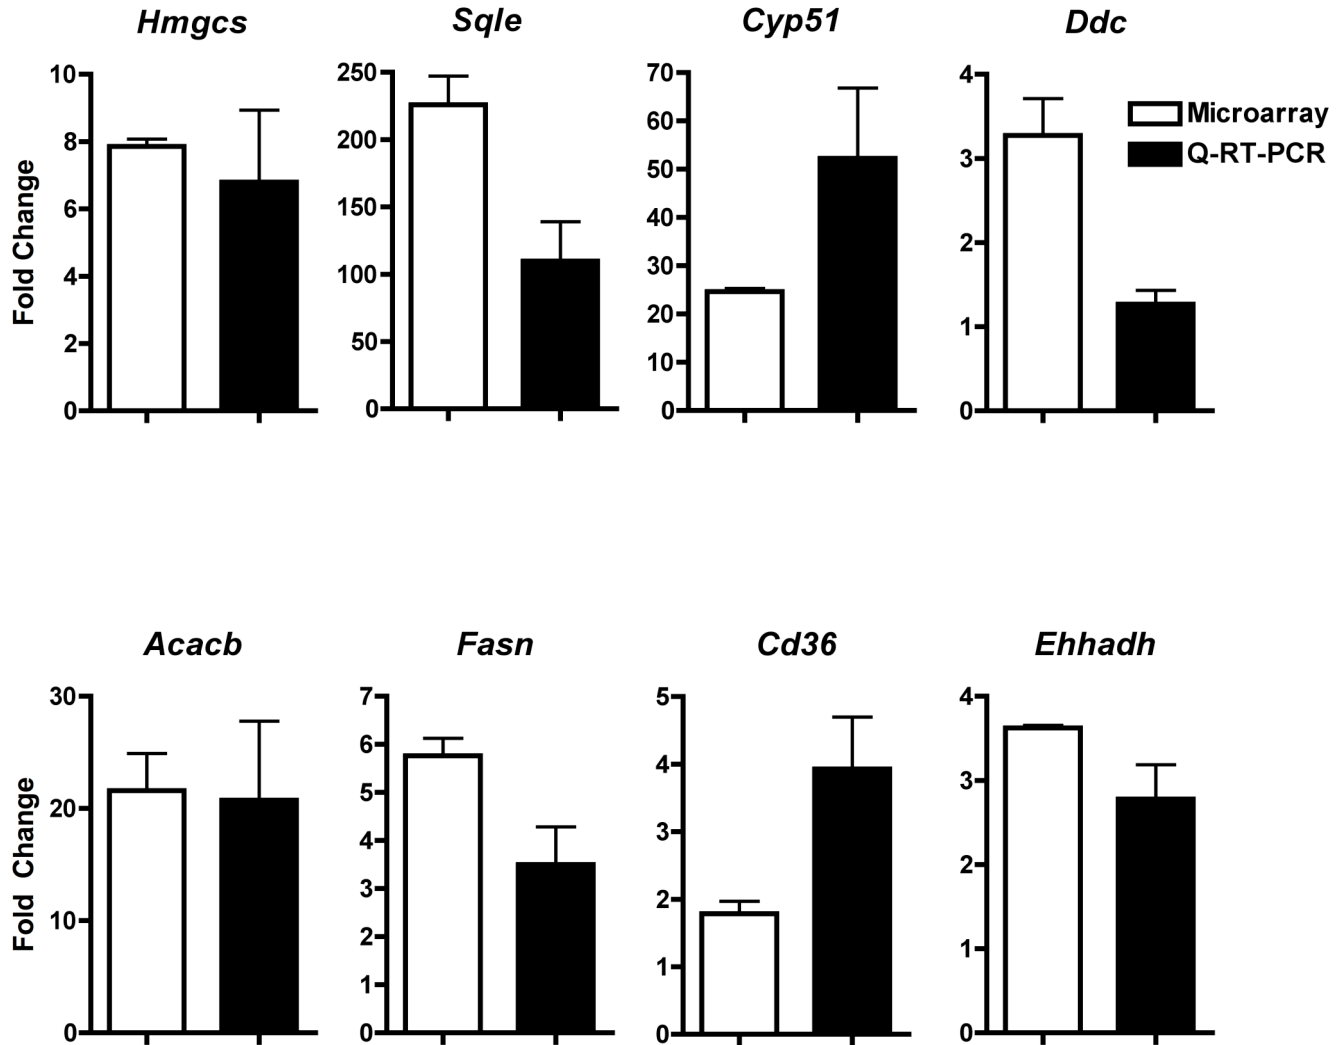

Supplement: emboj200851s4.pdf [file emboj200851s4.pdf]
